# Supplementary material for: Adsorption and kinetic studies on removal of levonorgestrel (lng) from aqueous solution using chemically modified and carbonized sawdust as adsorbent: DFT calculation
Source: Research Square preprint supplement (doi:10.21203/rs.3.rs-8670491/v1), 2026-02-20
Supplement: Supplementary file 1 [file 257de343c4727ece9facacb0.docx]

**Adsorption and kinetic studies on removal of levonorgestrel (lng) from aqueous solution using chemically modified and carbonized sawdust as adsorbent : DFT calculation**

Sarah Doofan Adia 1, Onche Emmanuel2, Abdelali Grich3, Taoufiq Bouzid3, Raymond A. Wuana4.

1 Centre for Food Technology and Research, Benue State University, Makurdi, Nigeria

2 Department of Chemistry, Centre for Agrochemical Technology and Environmental Research (CATER)Joseph Sarwuan Tarka University, Makurdi, Nigeria

3 Laboratory of Analytical and Molecular Chemistry, Cadi Ayyad University, Polydisciplinary Faculty, Safi, Morocco

4 Department of Environmental Sustainability, Joseph Sarwuan Tarka University, Makurdi, Nigeria

Corresponding author: Onche Emmanuel ([emmygen01@yahoo.com](mailto:emmygen01@yahoo.com))

| X-Values | LNG onto CSD | LNG onto ASD |
| --- | --- | --- |
| 2 | 23.235 | 17.771 |
| 5 | 25.747 | 19.777 |
| 7 | 29.281 | 22.494 |
| 9 | 24.084 | 20.107 |
| 11 | 23.417 | 19.716 |

Fig. 3 Effect of initial solution pH on aqueous phase removal of LNG by Chemically Activated (ASD) and Carbonised (CSD) sawdust adsorbents.

| X-Values | LNG onto CSD | LNG onto ASD |
| --- | --- | --- |
| 0.5 | 21.942 | 21.18 |
| 1 | 11.3285 | 11.2245 |
| 1.5 | 7.985666667 | 7.682666667 |
| 2 | 6.324 | 6.09525 |

Figure 4; Effect of Adsorbent dosage on Adsorption of Levonorgestrel (LNG) onto Chemically Activated Sawdust (ASD) and Carbonised Sawdust (CSD)

| X-Values | LNG onto CSD | LNG onto ASD |
| --- | --- | --- |
| 60 | 52.12 | 0.788 |
| 120 | 64.61 | 5.539 |
| 180 | 72.21 | 10.779 |
| 240 | 75.57 | 16.443 |
| 300 | 84.01 | 21.599 |

Figure 5; Effect of Initial concentration on Adsorption of Levonorgestrel (LNG) onto **Chemically Activated Sawdust (ASD) and Carbonized Sawdust (CSD)**

| X-Values | LNG onto CSD | LNG onto ASD |
| --- | --- | --- |
| 0 | 0 | 0 |
| 10 | 22.922 | 11.933 |
| 30 | 24.631 | 17.496 |
| 60 | 25.058 | 23.058 |
| 120 | 26.566 | 24.152 |

**Figure 6: Effect of contact time on Adsorption of Levonorgestrel (LNG) onto Chemically Activated Sawdust (ASD) and Carbonized Sawdust (CSD)**

| **ln Ce** | **LNG onto CSD** |
| --- | --- |
| 3.953549 | -0.213825719 |
| 4.168369 | 1.711813979 |
| 4.279579 | 2.377599797 |
| 4.325059 | 2.799899855 |
| 4.430936 | 3.072647017 |

**Figure 7: Freundlich Isotherm for Adsorption Adsorption of (LNG) onto (ASD) and (CSD)**

| ln Ce | LNG onto CSD |
| --- | --- |
| 3.953549 | 0.838257189 |
| 4.168369 | 5.611813979 |
| 4.279579 | 10.7775998 |
| 4.325059 | 16.49989985 |
| 4.430936 | 21.87264702 |

**Figure 8: Tempkin Isotherm for the adsorption of (LNG) onto (ASD) and (CSD)**

| ln Ce | LNG onto CSD | LNG onto ASD |
| --- | --- | --- |
| 0 | 0.502148 | 1.3829531 |
| 10 | 0.561578368 | 1.087035665 |
| 30 | 0.286680969 | 0.823213313 |
| 60 | 0.178401342 | 0.039017322 |
| 120 | 0 | 0.039017322 |

**Figure 9: Pseudo-Second-order kinetics for Adsorption of Levonorgestrel onto (ASD) and (CSD)**

| ln Ce | LNG onto CSD | LNG onto ASD |
| --- | --- | --- |
| 0 | 0 | 0 |
| 10 | 0.436262106 | 0.838012235 |
| 30 | 1.217977346 | 1.714677641 |
| 60 | 2.394444888 | 2.60213375 |
| 120 | 4.517051871 | 4.968532627 |

**Figure 9: Pseudo-Second-order kinetics for Adsorption of Levonorgestrel onto (ASD) and (CSD)**
